# Supplementary material for: Development of pervaporation membranes using chitosan and titanium glycine-N,N-dimethylphosphonate for dehydration of isopropanol
Source: Royal Society of Chemistry journal article supplement (doi:10.1039/c4ta05274a), 2015-01-01
Supplement: c4ta05274a1.pdf [file c4ta05274a1.pdf]

## Electronic Supplementary Information (ESI)

# Development of Pervaporation Membranes Using Chitosan and Titanium glycine-*N,N*-dimethylphosphonate for Dehydration of Isopropanol

H. G. Premakshi, A. M. Sajjan, M. Y. Kariduraganavar\*

Department of Chemistry, Karnatak University, Dharwad 580 003, India.

\*Corresponding author: Dr. M. Y. Kariduraganavar ([mahadevappayk@gmail.com](mailto:mahadevappayk@gmail.com))

Fax: +91-836-2771275; Phone: +91-836-2215286 (Extn. 23).

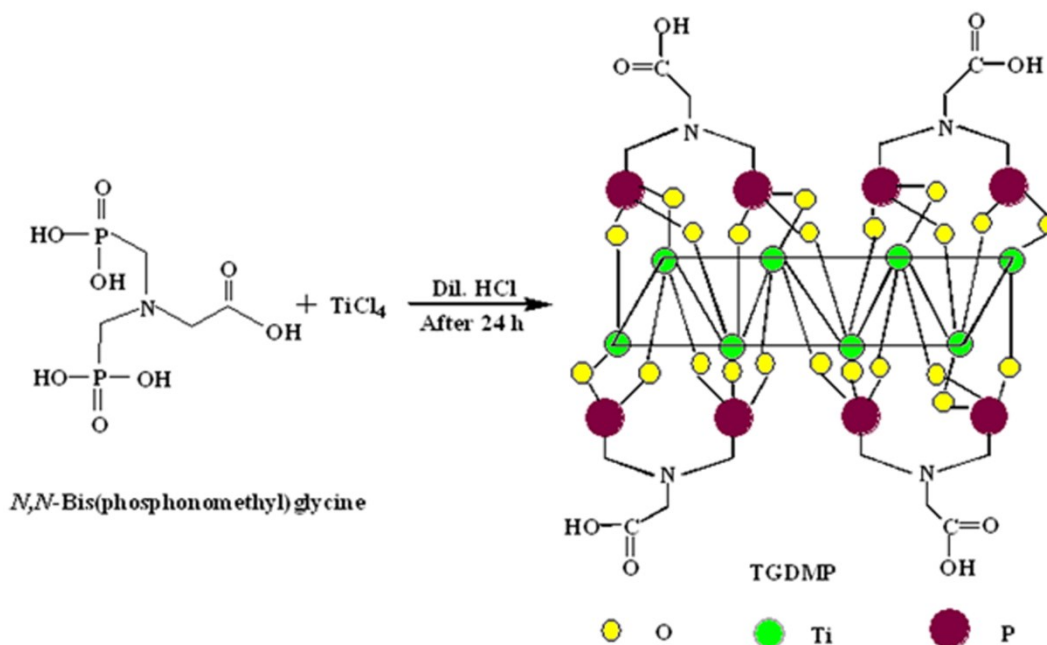

**Figure S1.** Scheme for the synthesis of titanium glycine-*N,N*-dimethylphosphonate (TGDMP).

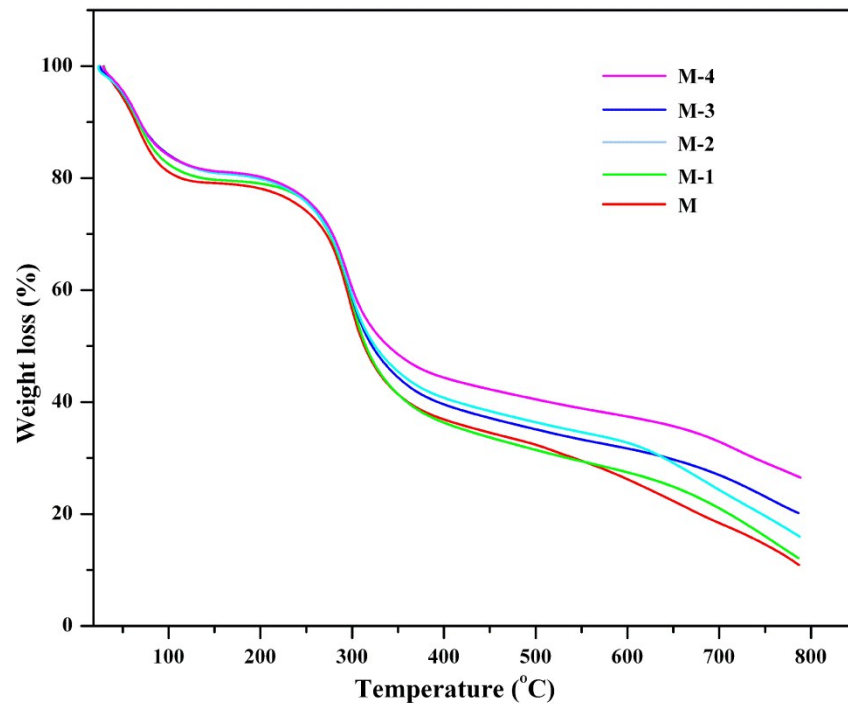

**Figure S2.** Thermogravimetric analysis of chitosan and its nanocomposite membranes: (M) 0 mass%; (M-1) 0.4 mass%; (M-2) 0.8 mass%; (M-3) 1.2 mass%; (M-4) 1.6 mass% of TGDMP.

**Table S3.** Diffusion coefficients of water and isopropanol for all membranes at different mass% of water in the feed.

| Mass<br>% of<br>water | $D_w \times 10^8$ (cm <sup>2</sup> /s) |      |       |       |       | $D_{IPA} \times 10^{10}$ (cm <sup>2</sup> /s) |       |       |       |       |
|-----------------------|----------------------------------------|------|-------|-------|-------|-----------------------------------------------|-------|-------|-------|-------|
|                       | M                                      | M-1  | M-2   | M-3   | M-4   | M                                             | M-1   | M-2   | M-3   | M-4   |
| 5                     | 4.41                                   | 5.11 | 10.20 | 10.82 | 11.51 | 2.67                                          | 2.62  | 2.55  | 1.50  | 3.41  |
| 10                    | 5.65                                   | 8.69 | 10.53 | 11.31 | 12.91 | 6.10                                          | 5.33  | 4.64  | 3.66  | 11.42 |
| 15                    | 6.14                                   | 8.98 | 11.02 | 11.91 | 13.82 | 11.12                                         | 10.31 | 10.10 | 9.08  | 22.31 |
| 20                    | 7.09                                   | 9.32 | 11.32 | 12.10 | 15.80 | 39.01                                         | 35.00 | 29.81 | 28.60 | 50.71 |
| 25                    | 7.90                                   | 9.85 | 13.01 | 15.00 | 17.71 | 58.61                                         | 54.41 | 49.91 | 40.82 | 68.80 |

**Table S4.** Pervaporation flux and separation selectivity of all different membranes at different temperatures for 10 mass% of water in the feed.

| Temp.<br>°C | $J \times 10^2$ (kg/m <sup>2</sup> h) |      |      |      |       | $\alpha_{sep}$ |     |     |      |     |
|-------------|---------------------------------------|------|------|------|-------|----------------|-----|-----|------|-----|
|             | M                                     | M-1  | M-2  | M-3  | M-4   | M              | M-1 | M-2 | M-3  | M-4 |
| 30          | 3.20                                  | 4.93 | 6.41 | 7.37 | 10.22 | 554            | 607 | 694 | 1050 | 591 |
| 40          | 4.28                                  | 5.00 | 6.56 | 7.82 | 10.97 | 329            | 374 | 453 | 554  | 453 |
| 50          | 5.04                                  | 5.72 | 6.83 | 7.93 | 11.37 | 293            | 299 | 374 | 410  | 329 |

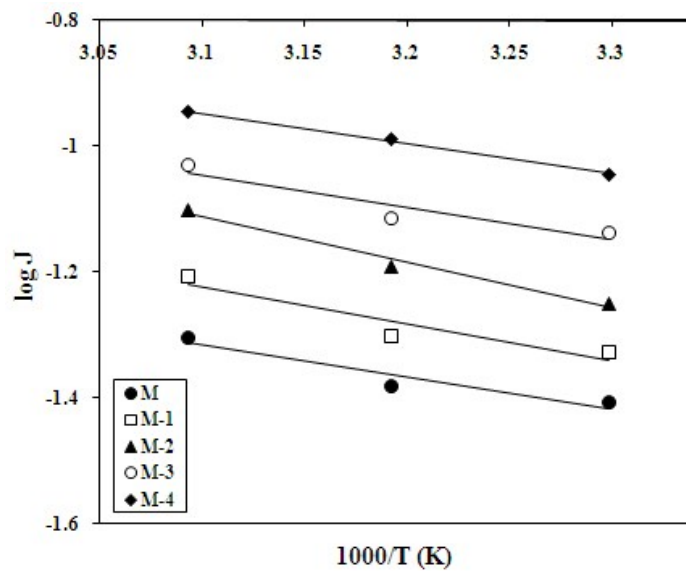

**Figure S5.** Variation of  $\log J$  with temperature for chitosan and its nanocomposite membranes at 10 mass% of water in the feed.

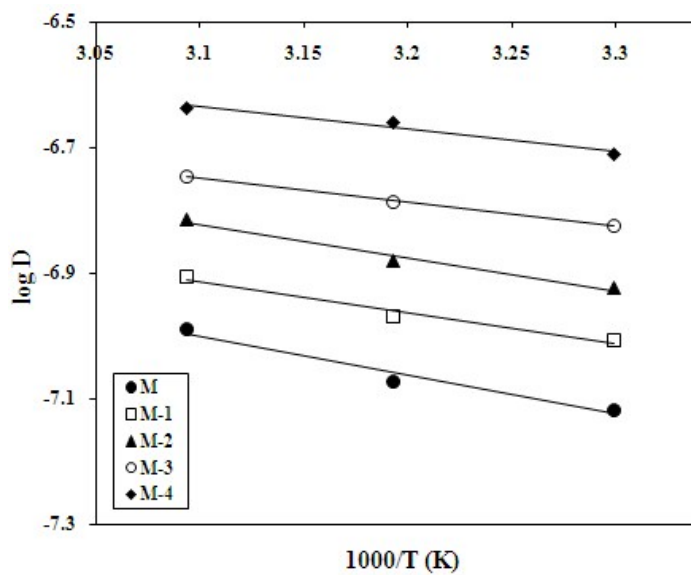

**Figure S6.** Variation of  $\log D$  with temperature for chitosan and its nanocomposite membranes at 10 mass% of water in the feed.
